# Supplementary material for: Towards personalized medicine: chemosensitivity assays of patient lung cancer cell spheroids in a perfused microfluidic platform
Source: Royal Society of Chemistry journal article supplement (doi:10.1039/c5lc00454c), 2015-01-01
Supplement: c5lc00454c1.pdf [file c5lc00454c1.pdf]

# Towards personalized medicine: Chemosensitivity assays of patient lung cancer cell spheroids in a perfused microfluidic platform<sup>†</sup>

*Received Xth XXXXXXXXXXXX 20XX, Accepted Xth XXXXXXXXXXXX 20XX*

*First published on the web Xth XXXXXXXXXXXX 200X*

DOI: 10.1039/b000000x

## Supplementary Figures

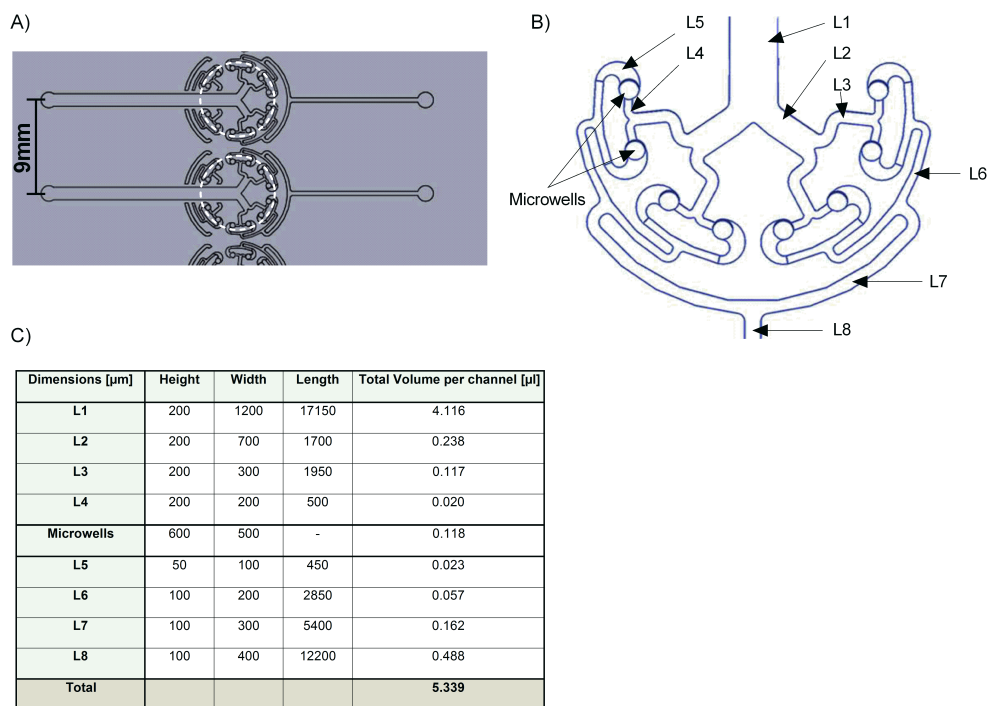

**Fig. 1 S1:** A) Overall view of the microfluidic design. The virtual line (white) represents the diameter of a well in a 96-well plate. B) Close up of the microfluidic branching. C) Table showing the dimensions of microfluidic system.

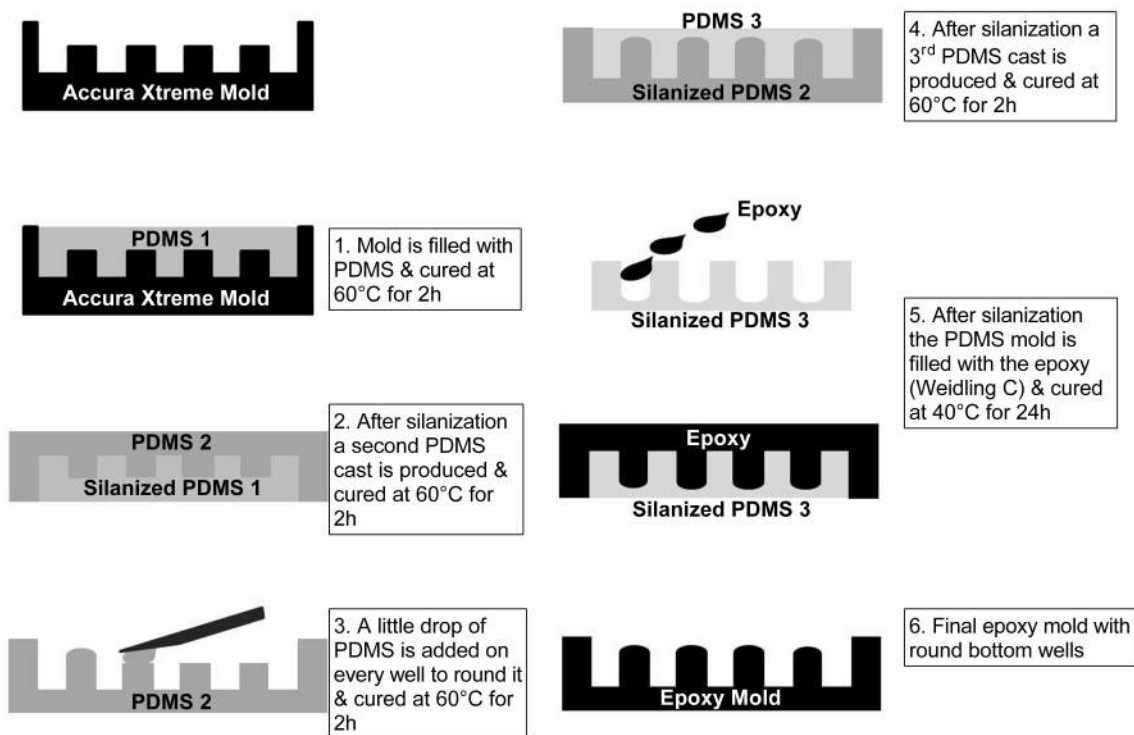

**Fig. 2 S2:** Fabrication processes of round bottom microwells.

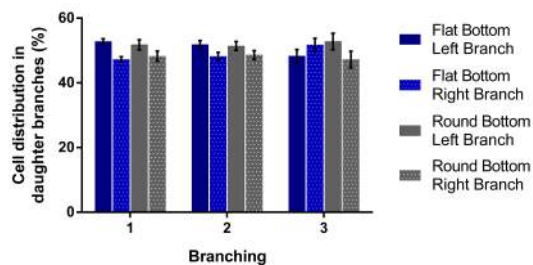

**Fig. 3 S3:** Graph showing the distribution of cells at the three branching points (1, 2 and 3). Data are presented as means  $\pm$  SEM. N=8

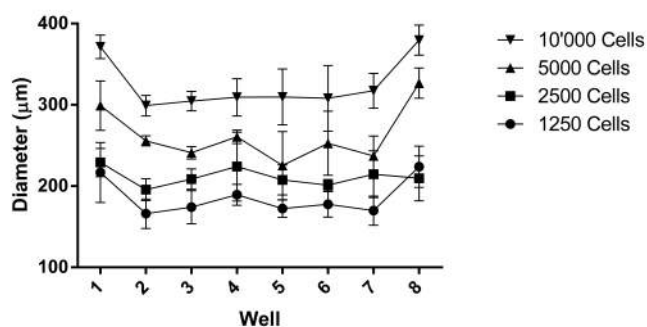

**Fig. 4 S4:** Spheroid diameter in function of the microwell position (three days after seeding). Data are presented as means  $\pm$  SD. N=4

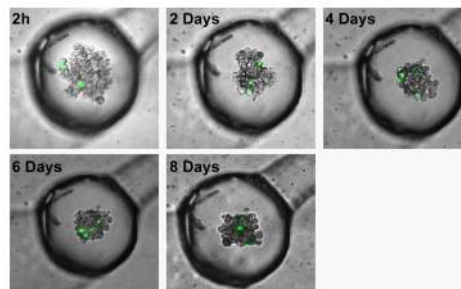

**Fig. 5 S5:** Proliferation of two CFSE stained cells within a small spheroid containing 150 cells. Scale bar corresponds to 250  $\mu$ m.

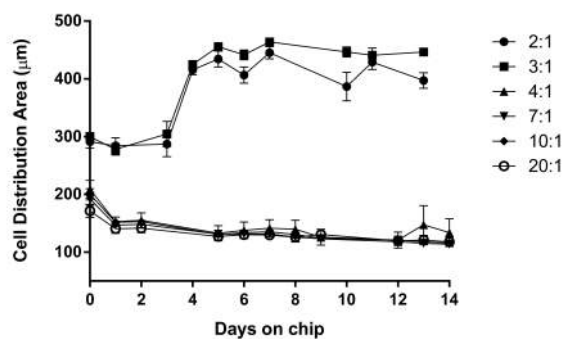

**Fig. 6 S6:** Graph showing the different ratio of PLETcs and PCs tested on chip over a time period of 2 weeks.
